# Supplementary material for: Occupational exposures associated with being a COVID-19 case; evidence from three case-controls studies
Source: bioRxiv or medRxiv preprint supplement (doi:10.1101/2020.12.21.20248161), 2020-12-22
Supplement: Supplementary file [file media-1.pdf]

SE-1: Table1: Multivariable analysis results on leisure activity exposures by study period

| Leisure exposure                             | Period 1   |          |         |        | Period 2   |          |         |       | Period 3   |          |         |       |
|----------------------------------------------|------------|----------|---------|--------|------------|----------|---------|-------|------------|----------|---------|-------|
|                                              | Odds ratio | 95% C.I. | P-value |        | Odds ratio | 95% C.I. | P-value |       | Odds ratio | 95% C.I. | P-value |       |
| Eating out <sup>a</sup>                      | 0.76       | 0.62     | 0.92    | 0.005  | 0.83       | 0.68     | 1.02    | 0.073 | 0.76       | 0.61     | 0.94    | 0.011 |
| Sports events <sup>b</sup>                   | 0.98       | 0.50     | 1.92    | 0.958  | 0.77       | 0.41     | 1.44    | 0.409 | 0.68       | 0.32     | 1.46    | 0.325 |
| Private events <sup>c</sup>                  | 1.40       | 0.80     | 2.44    | 0.233  | 1.72       | 0.86     | 3.42    | 0.122 | 0.73       | 0.24     | 2.21    | 0.578 |
| Attending places of worship <sup>d</sup>     | 0.47       | 0.21     | 1.03    | 0.059  | 0.15       | 0.06     | 0.39    | 0     | 0.21       | 0.09     | 0.46    | 0     |
| Attending mass gatherings <sup>e</sup>       | 0.93       | 0.36     | 2.40    | 0.881  | 2.45       | 0.60     | 10.02   | 0.211 | 18.74      | 0.75     | 467.26  | 0.074 |
| Charity events <sup>f</sup>                  | 0.50       | 0.20     | 1.25    | 0.14   | 0.29       | 0.11     | 0.77    | 0.013 | 0.40       | 0.13     | 1.24    | 0.113 |
| Personal exercise <sup>g</sup>               | 0.66       | 0.49     | 0.89    | 0.006  | 0.96       | 0.72     | 1.27    | 0.773 | 0.88       | 0.67     | 1.15    | 0.347 |
| Personal care <sup>h</sup>                   | 0.16       | 0.09     | 0.30    | <0.001 | 0.41       | 0.25     | 0.69    | 0.001 | 0.43       | 0.26     | 0.71    | 0.001 |
| Shopping <sup>i</sup>                        | 0.13       | 0.11     | 0.16    | <0.001 | 0.15       | 0.13     | 0.17    | 0     | 0.17       | 0.14     | 0.20    | 0     |
| Travel <sup>j</sup>                          | 1.01       | 0.67     | 1.53    | 0.956  | 0.76       | 0.48     | 1.20    | 0.241 | 0.42       | 0.24     | 0.72    | 0.002 |
| Visiting family and friends <sup>k</sup>     | 0.27       | 0.21     | 0.34    | <0.001 | 0.34       | 0.27     | 0.43    | 0     | 0.38       | 0.29     | 0.50    | 0     |
| Healthcare (non-Covid19 reason) <sup>l</sup> | 0.23       | 0.14     | 0.37    | <0.001 | 0.30       | 0.20     | 0.44    | 0     | 0.27       | 0.18     | 0.39    | 0     |
| Entertainment - other <sup>m</sup>           | 11.64      | 4.03     | 33.65   | <0.001 | 5.38       | 1.95     | 14.85   | 0.001 | 9.41       | 2.19     | 40.45   | 0.003 |
| Entertainment - pubs and bars <sup>n</sup>   | 1.85       | 1.10     | 3.11    | 0.02   | 2.38       | 1.34     | 4.23    | 0.003 | 1.86       | 0.77     | 4.52    | 0.171 |

- a. Eating out – in different restaurants, cafes, pubs
- b. Sports events - including football, cricket, rugby, tennis etc. matches, horse races and other sports events
- c. Private events – including weddings, funerals, parties, other social gatherings
- d. Places of worship – including churches, mosques, synagogues and other places of worship
- e. Mass gatherings – raves, gigs, festivals, protests and live music events
- f. Charity and community – fundraising, volunteering, bootsale, corporate events, educational classes
- g. Personal exercise – e.g. at the gym, swimming, running clubs, casual exercise with friends
- h. Personal care - Visiting nail salons, hairdressers, barbers, tanning and tattoo studios
- i. Shopping - including shopping at supermarkets, local shops and pharmacies
- j. Travel - any international and domestic travel including trains and flights
- k. Visiting family or friends – indoors or outdoors
- l. Health care - visiting healthcare services for non-COVID-19 reasons
- m. Other entertainment activities (non-specific)
- n. Going to pub or bar (entertainment, not e.g. eating out)
